# Supplementary material
Source: HighWire-hosted journal article supplement (https://bmjopen.bmj.com/content/7/9/e015383)
Supplement: inline-supplementary-material-1 [file inline-supplementary-material-1.docx]

| **#** | **Searches** |
| --- | --- |
| 1 | methamphetamine.tw. or Methamphetamine/ |
| 2 | Amphetamine-Related Disorders/ or Amphetamine/ or amphetamine.tw. |
| 3 | 1 or 2 |
| 4 | Psychotherapy/ or psychotherapy.tw. |
| 5 | ((psychosocial or psycho social) adj5 (treatment* or therap*)).mp. |
| 6 | cognitive therapy/ or "acceptance and commitment therapy"/ or mindfulness/ or (cognitive adj5 (therap* or treatment*)).tw. |
| 7 | Behavior Therapy/ or contingency management.mp. |
| 8 | Motivational Interviewing/ |
| 9 | brief intervention*.mp. |
| 10 | (cognitive behavio?r* adj5 (treatment* or therap*)).mp. |
| 11 | (abstinence adj5 (treatment* or therap*)).mp. |
| 12 | 4 or 5 or 6 or 7 or 8 or 9 or 10 or 11 |
| 13 | Mental Disorders/ |
| 14 | Mental Health/ |
| 15 | Anxiety/ |
| 16 | Depression/ |
| 17 | Psychotic Disorders/ |
| 18 | (mental health or mental disorder* or mental illness* or anxiety or depression or psychosis or hostil*).tw. |
| 19 | 13 or 14 or 15 or 16 or 17 or 18 |
| 20 | 3 and 12 and 19 |
| 21 | animal/ not (human/ and animal/) |
| 22 | 20 not 21 |
| 23 | limit 22 to english language |

**Appendices**

**Appendix A**

**Medline Search Strategy**
